# Supplementary material for: Mutation Rate, Spectrum, Topology, and Context-Dependency in the DNA Mismatch Repair-Deficient Pseudomonas fluorescens ATCC948
Source: PubMed Central journal article supplement (PMC4316635; doi:10.1093/gbe/evu284), 2014-12-23
Supplement: supp_evu284_File_S2.Alignment.pdf [file supp_evu284_File_S2.Alignment.pdf]

**Supplemental file 2.** Alignments showing indels in de novo assembly libraries creating gaps. Each alignment shows the reference sequence from de novo assembly based on Illumina reads, sequences of MA line with the indel and the control line by Sanger sequencing. Indels are marked red, bold and underlined. Please note most of the flanking alignments were omitted for visualization purpose.

>1:scaffold4:9285

Ref: CAAATGTGACAGCGGGCAAGCCAGCCCCNNNNNNNNNNNNNNNNNNNNNNNNNNNNNNNNNN  
MA: CAAATGTGACAGCGGGCAAGCCAGCCCCCTATTTTGATCTTCGCCAGTCGTA  
Control: CAAATGTGACAGCGGGCAAGCCAGCCCC-TATTTTGATCTTCGCCAGTCGTA

>1:scaffold15:12931

GCGCTCGCGGCTGGAAGCGTTTATGGGGGG-----NNNNNNNNNNNNNNNGCTTGCCAC  
GCGCTCGCGGCTGGAAGCGTTTATGGGGGGGCTGAGAGCGCTAAGCGGCACGTATCTCTGCGCTTCTCTTGCCGCATCTGCTTGA  
CGCTTGCCAC  
GCGCTCGCGGCTGGAAGCGTTTATGGGGGG-CTGAGAGCGCTAAGCGGCACGTATCTCTGCGCTTCTCTTGCCGCATCTGCTTGA  
GCTTGCCAC

>67:scaffold32:82543

ATCGCCAAACATCAATTGCAGACAGGGGG-----NNNNNNNNNNNACTGATAATACGGT  
ATCGCCAAACATCAATTGCAGACAGGGGGGAAATCTGAAGCCCGGCGGTTCTGATTGAACTTGAAGGCTGCGACCTGGCAGGCC  
TGACTGATAATACGGT  
ATCGCCAAACATCAATTGCAGACAGGGGG-AAATCTGAAGCCCGGCGGTTCTGATTGAACTTGAAGGCTGCGACCTGGCAGGCCT  
GACTGATAATACGGT

>67:scaffold37:206678

CGATCACGCCAGGGCGTCAACGTGGGGGG-----NNNNTCACCGGGGACATTTTCTCC  
CGATCACGCCAGGGCGTCAACGTGGGGGGGTGTGGCTGTCGGTGCCGACGCAGGTATCCGGGAAGGCCACGCCATCACGCACCT  
GGATCACCGGGGACATTTTCTCC  
CGATCACGCCAGGGCGTCAACGTGGGGGG-TGTGGCTGTCGGTGCCGACGCAGGTATCCGGGAAGGCCACGCCATCACGCACCTG  
GATCACCGGGGACATTTTCTCC

>67:scaffold38:13174:de\_novo

CGCGGCGACCGCGATGGCCGCTGCGGTGTT-----NNNNNNNNNNNNNNNTCGTCGAGGGTGCG  
CGCGGCGACCGCGATGGCCGCTGCGGTGTTIGCGGCCAAACGTTTCGAGCAGCAAATCCAGGCCAGTTGGCCGGTGTGACCGCG  
CGGTAATCGTCGAGGGTGCG  
CGCGGCGACCGCGATGGCCGCTGCGGTGTT-GCGGCCAAACGTTTCGAGCAGCAAATCCAGGCCAGTTGGCCGGTGTGACCGCG  
CGGTAATCGTCGAGGGTGCG

>73:scaffold5:119898

CCGGCAACTGGAACCAGAACATCGGCC-----NNNNNTGGTGAAGCCCTGGCCAGC  
CCGGCAACTGGAACCAGAACATCGGCCCTGCACTTTGGCAGTGATGTGCACGGCAAGACCCTGGGCATCATTGGCATGGGGCG  
CATTGGTGAAGCCCTGGCCAGC  
CCGGCAACTGGAACCAGAACATCGGCC-TGCACTTTGGCAGTGATGTGCACGGCAGGACCCAGCGCATCATTGGCATGGGGCGC  
ATTGGTGAAGCCCTGGCCAGC

>73:scaffold8:99634:de\_novo

CACACGCAAATCCAGGGAGGCCAGCTT-GGG-----  
GNNNNNGGGGTAAAAAAGCATGCATCT

CACACGCAAATCCAGGGAGGCCAGCTTGGGGTCCGTCAGGCGGATCTTCAGCGTGTCCAGTTCAAGGTTGTGGGTCATTGACTTG  
GCCAAGGGGTAAAAAAGCATGCATCT

CACACGCAAATCCAGGGAGGCCAGCTT-GGGTCCGTCAGGCGGATCTTCAGCGTGTCCAGTTCAAGGTTGTGGGTCATTGACTTGG  
CCAAGGGGTAAAAAAGCATGCATCT
